# Supplementary material for: The Angiostrongylus vasorum Excretory/Secretory and Surface Proteome Contains Putative Modulators of the Host Coagulation
Source: Frontiers journal article supplement (doi:10.3389/fcimb.2021.753320), 2021-11-02

Supplementary Material

## Supplementary Figures

**Supplementary Material 2.** Comparison between female and male *Angiostrongylus vasorum* excretory/secretory proteins (ESP) and surface proteins

**
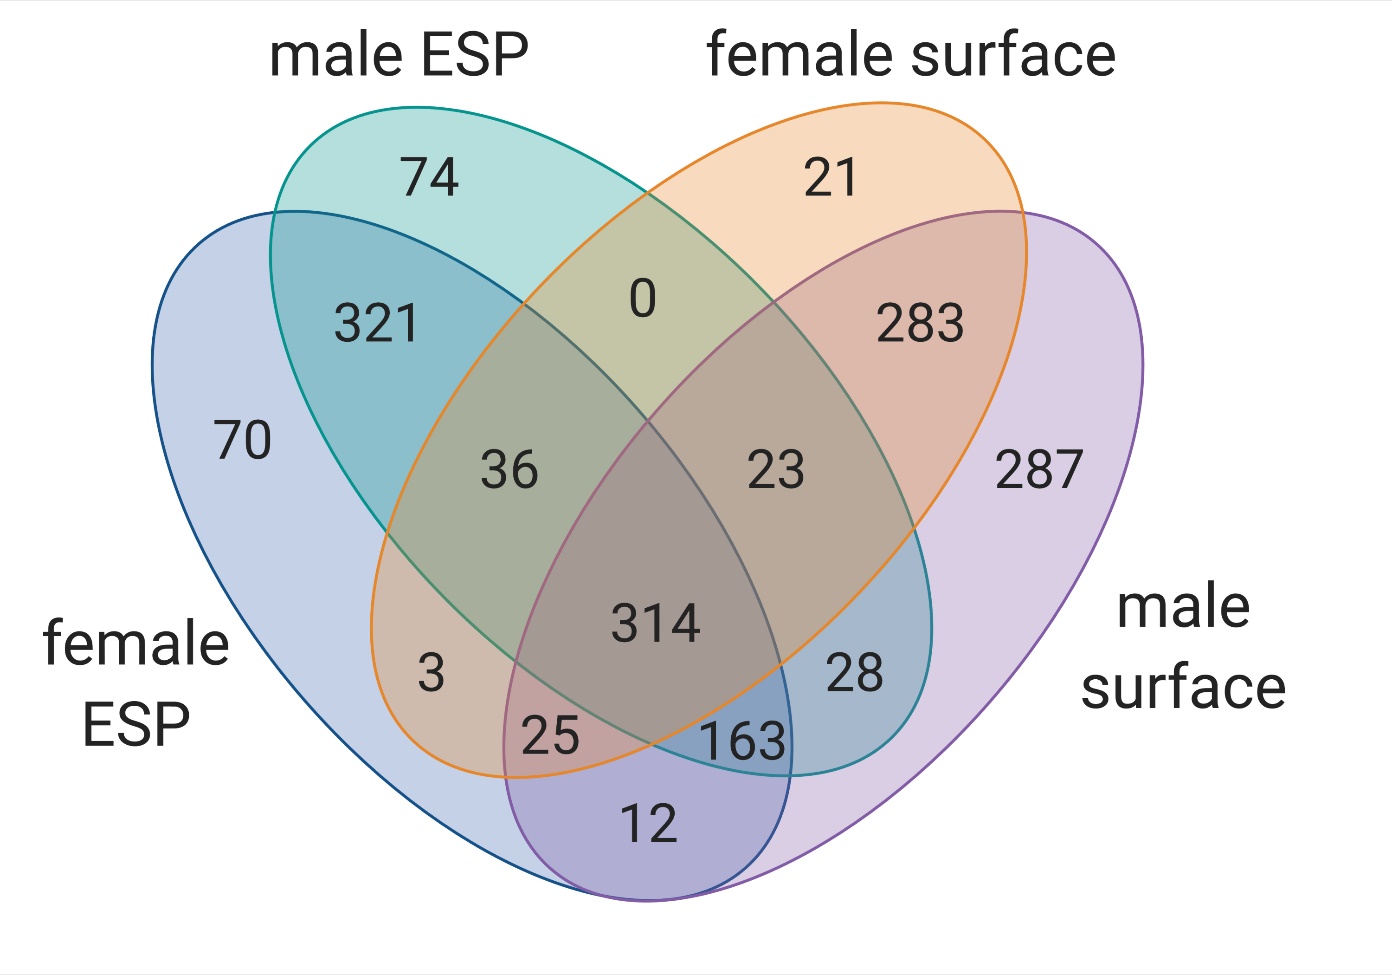
**

**Supplementary Material 3.** Immunolocalization negative and absorption controls of enolase (ENO) and major sperm protein (MSP) on *Angiostrongylus vasorum* female and male adult cuticular surfaces showing red and blue fluorescent signal for actin and DNA, but no specific enolase or MSP fluorescent signal.

**
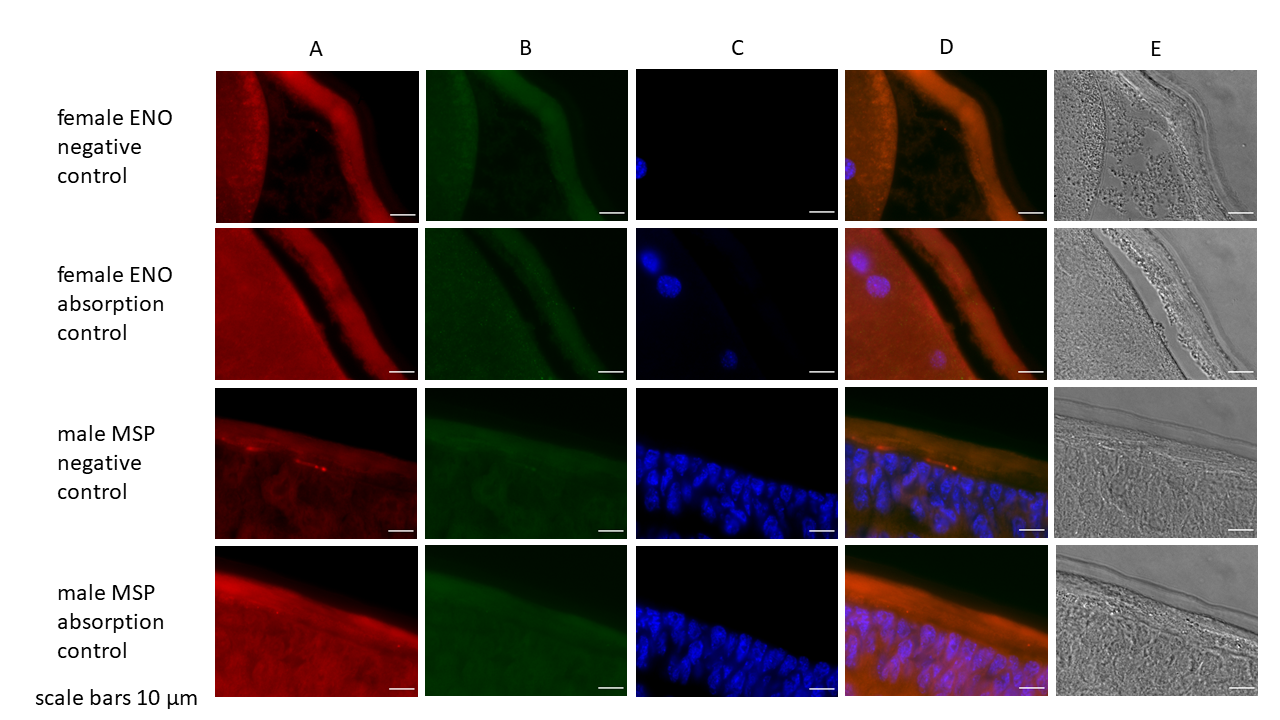
**

**Supplementary Material 6.** Gel electrophoresis (4% agarose gel) of qPCR products from canine endothelial cells stimulated with *Angiostrongylus vasorum* excretory/secretory proteins


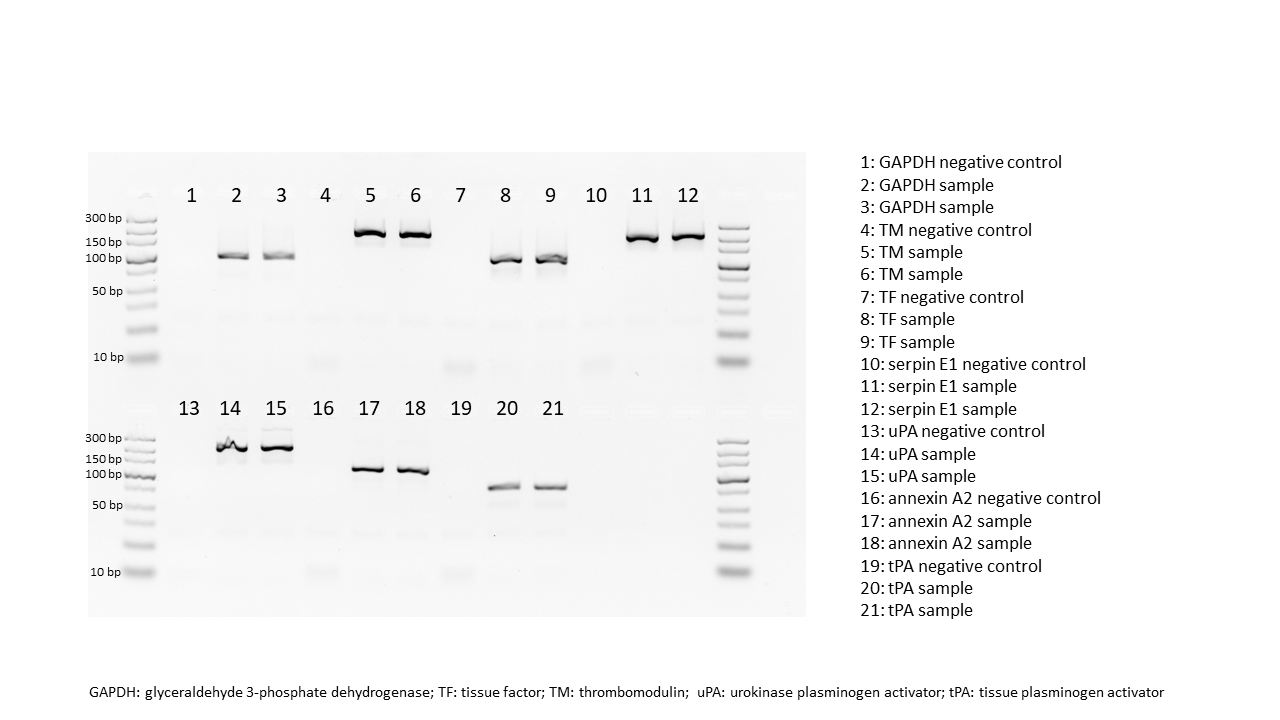

Supplement: Data_Sheet_1.zip [file Data_Sheet_1.zip]
